# Supplementary material for: Adiponectin deficiency contributes to the development and progression of benign prostatic hyperplasia in obesity
Source: PubMed Central journal article supplement (PMC5335662; doi:10.1038/srep43771), 2017-03-03
Supplement: srep43771-s1.pdf [file srep43771-s1.pdf]

## **Supplementary materials**

Title: Adiponectin deficiency contributes to the development and progression of benign prostatic hyperplasia in obesity

Authors: Shi Fu, Huan Xu, Meng Gu, Chong Liu, Qiong Wang, Xiang Wan, Yanbo Chen, Qi Chen, Yubing Peng, Zhikang Cai, Juan Zhou & Zhong Wang

Correspondence to: Zhong Wang, Department of Urology and Andrology, Shanghai Ninth People's Hospital, Zhizaoju Road, No. 639, Shanghai, 200011, China. E-mail: zhongwang2000@sina.com; Tel: (86-21)23271007; Fax: (86-21)63136856.

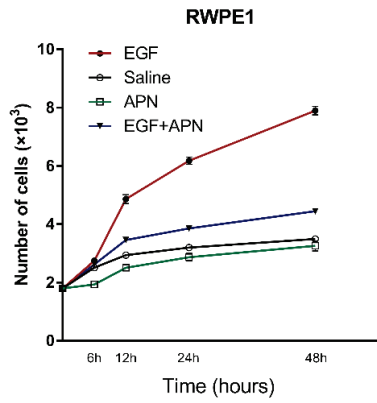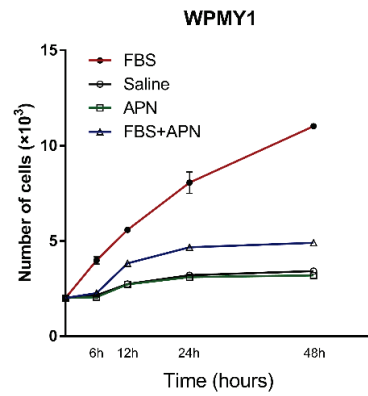

**Supplementary figure S1.** The cell growth curve of RWPE1 and WPMY1 cells with treatment of the indicated conditions.

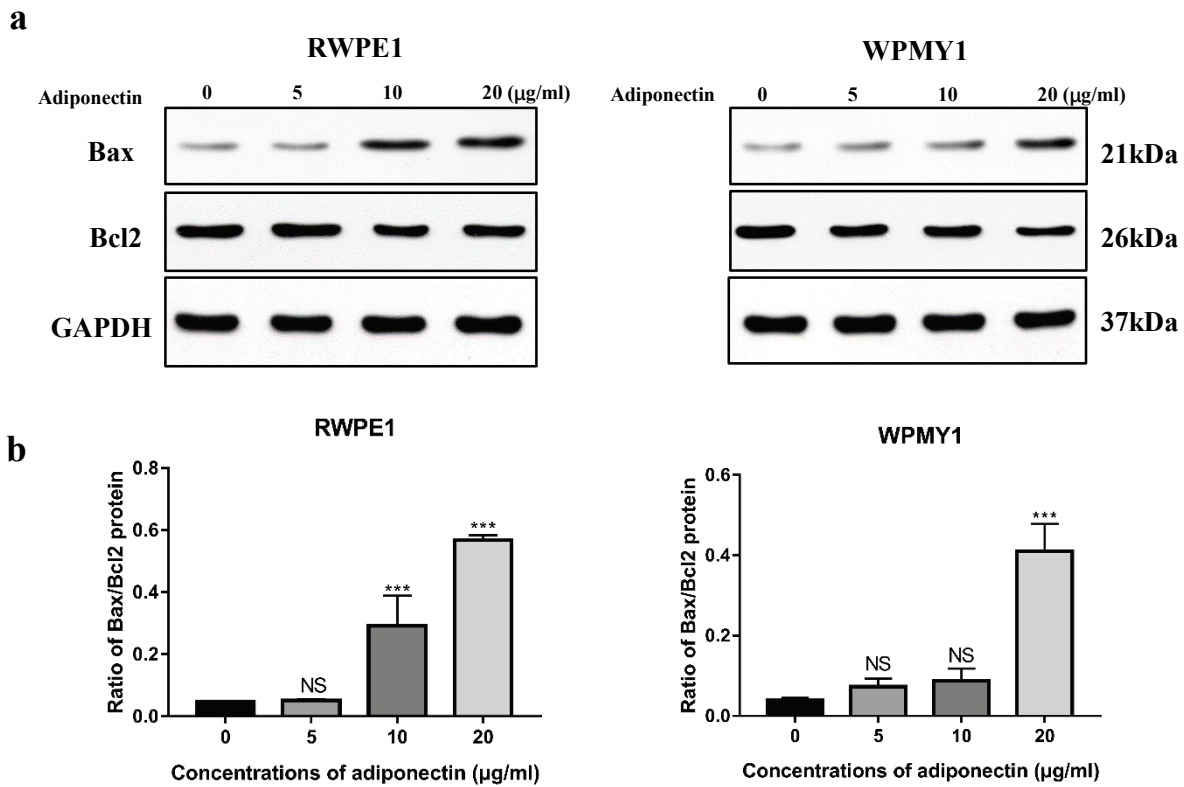

**Supplementary figure S2.** (a) Cells were treated with different concentrations of adiponectin (0, 5, 10 and 20 µg/ml) for 6 h. Then cellular extracts were analysed for the expression of Bax and Bcl2 by immunoblotting. (b) The ratio of Bax and Bcl2 was determined. Data are presented as the means ± s.d. of three independent experiments (one-way analysis of variance followed by Dunnett's post-tests; n=3; \*\*\*p<0.001 versus control, NS, not significant).

**Fig. 1**

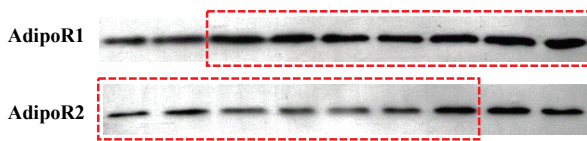

**Fig. 3**

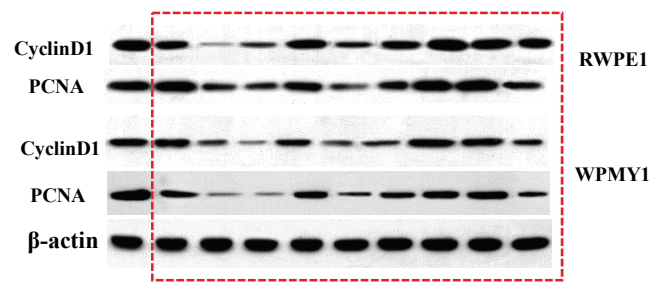

**Fig. 5**

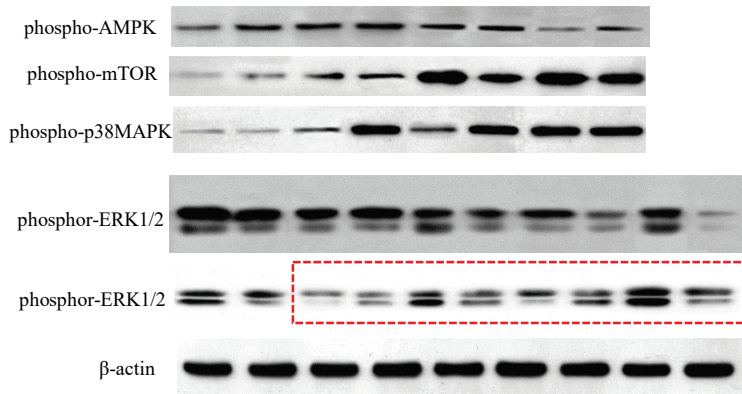

**Fig. 4**

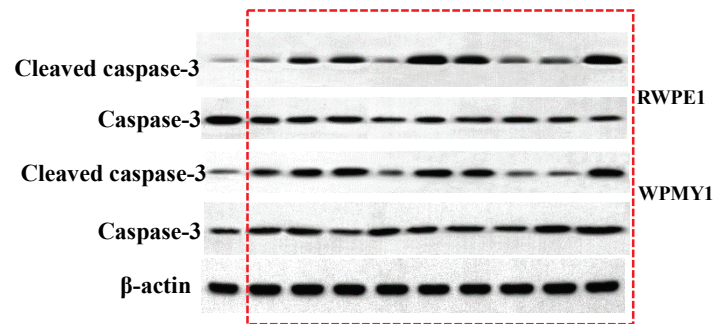

**Fig. S2**

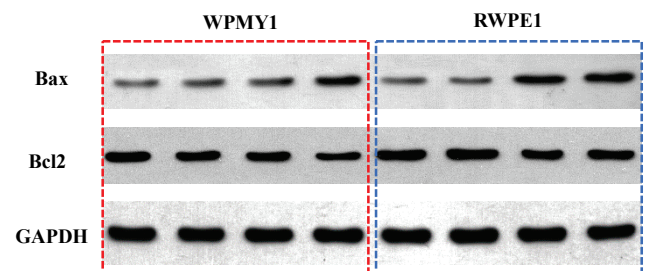

**Supplementary figure S3.** Full-length blots for some cropped and high-contrast protein bands in the paper.
